tain sheep, rabbits, birds, fish, and geometric figures. Remarkable for their size and elaboration, they are believed to have been made by the aboriginal inhabitants of the area prior to Spanish occupation. However, one scene and some artifacts indicate Spanish influence.

Although the painted caves of Baja California were known to the Spanish missionaries and to subsequent infrequent visitors, only one site was scientifically studied during the period prior to recent investigations. None other than Erle Stanley Gardner discovered the most spectacular of the paintings and financed another expedition into the area in 1962 to examine four sites. Clement W. Meighan, who participated in the expedition as an archaeologist, has written a slim volume analyzing the sites, the ethnographic and historic backgrounds, the artifacts found at the sites, the figures themselves, and the features and purpose of the paintings. Meighan concludes his study with the following observation: "The newly studied painted caves are important because they show the existence of a relatively specialized hunting people over several hundred square miles of a little-known corner of the world. . . . The present study confirms and amplifies previous work by documenting the fact that there is not one large cave of specialized ceremonial nature but many large rock shelters in the same style and occurring throughout at least one hundred miles of mountain range" (pp. 75-76).

The charts, map, and illustrations found in the book are outstanding, and the material contained within is presented in an excellent fashion. Since rock art seldom provides internal evidence for the period of origin, the author was limited in his attempts to establish dates for the paintings and purpose and culture of the artists.

James Covington  
University of Tampa

*National Maritime Museum Catalogue of the Library*. Vol. II: *Biography*.

Parts 1 and 2. London, 1969. Her Majesty's Stationery Office. Illustrations. Indices. Pp. xiii, v, 977. \$26.55. (Available through British Information Service).

Volume I of this series was noted in *HAHR*, May 1969, pp. 396-397. The present pair of tomes lists those publications in the Library of the National Maritime Museum on the lives of navigators, naval officers, or even sailors. Part Two, an alphabetical reference index, is useful by itself as a handy guide to obscure seamen. In it one may learn, for example, of five Pritchards, one a paymaster in the U.S. Navy, another an astronomer, and the others officers (two commanders and a captain) in the Royal Navy—also where to find out more about them. Of commoner names there are naturally longer entries—for example, nineteen Jacksons, from Commander Caleb, RN (b. 1791), to Captain William Rush, also RN (d. 1835). In some cases the connection with salt water is a bit tenuous, as with Nicholas Pocock (1741?-1821), marine painter.

The books are handsomely illustrated and printed.

D. M. P.

*Sir Francis Drake. A Pictorial Biography*. By HANS P. KRAUS. With a Historical Introduction by Lt. Commander David W. Waters and Richard Boulind, and a detailed Catalogue of the Author's Collection. Amsterdam, 1970. N. Israel. Notes. Bibliography. Pp. viii, 236. 300 guilders (Dutch).

This sumptuously produced, beautifully printed, and lavishly illustrated work derives jointly from a labor of love and from expertise. The fame of H. P. Kraus' almost legendary collection of manuscripts, books, maps, medals, and other material relating to Drake is now shown to be fully deserved; and it is here placed in its historical setting in a manner that could not be bettered.

Despite the fact that Drake has for
